# Supplementary material
Source: PubMed Central journal article supplement (PMC6168967)

# Supplemental Figure 1

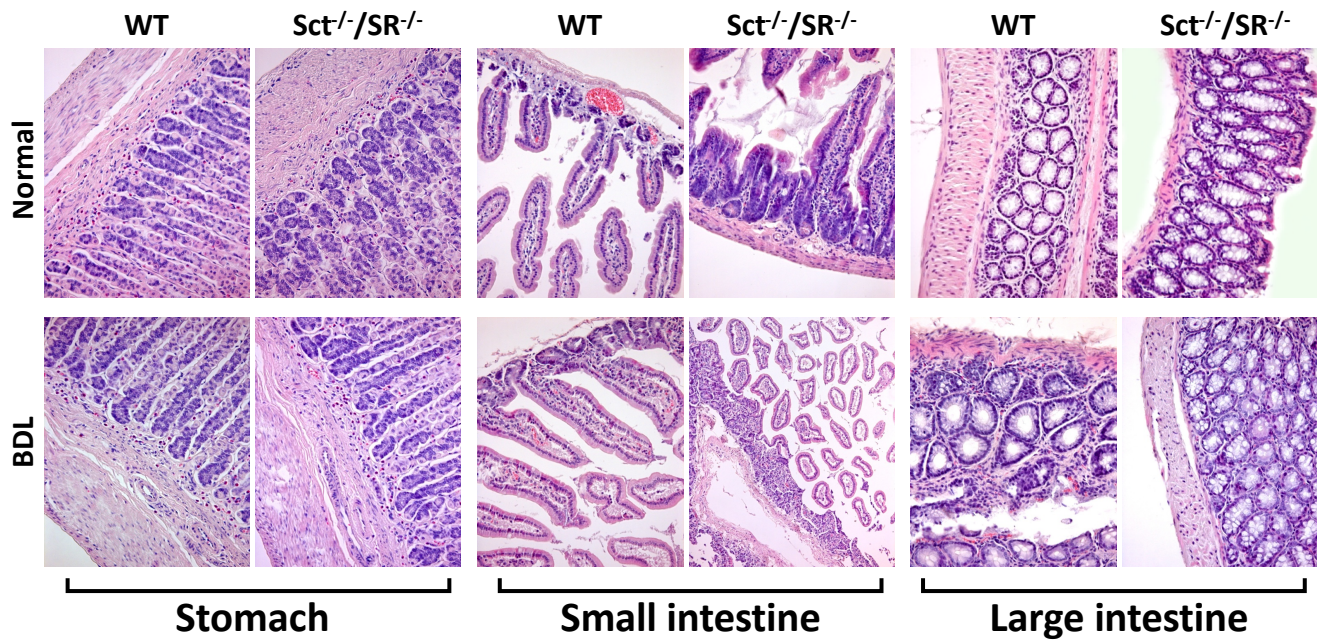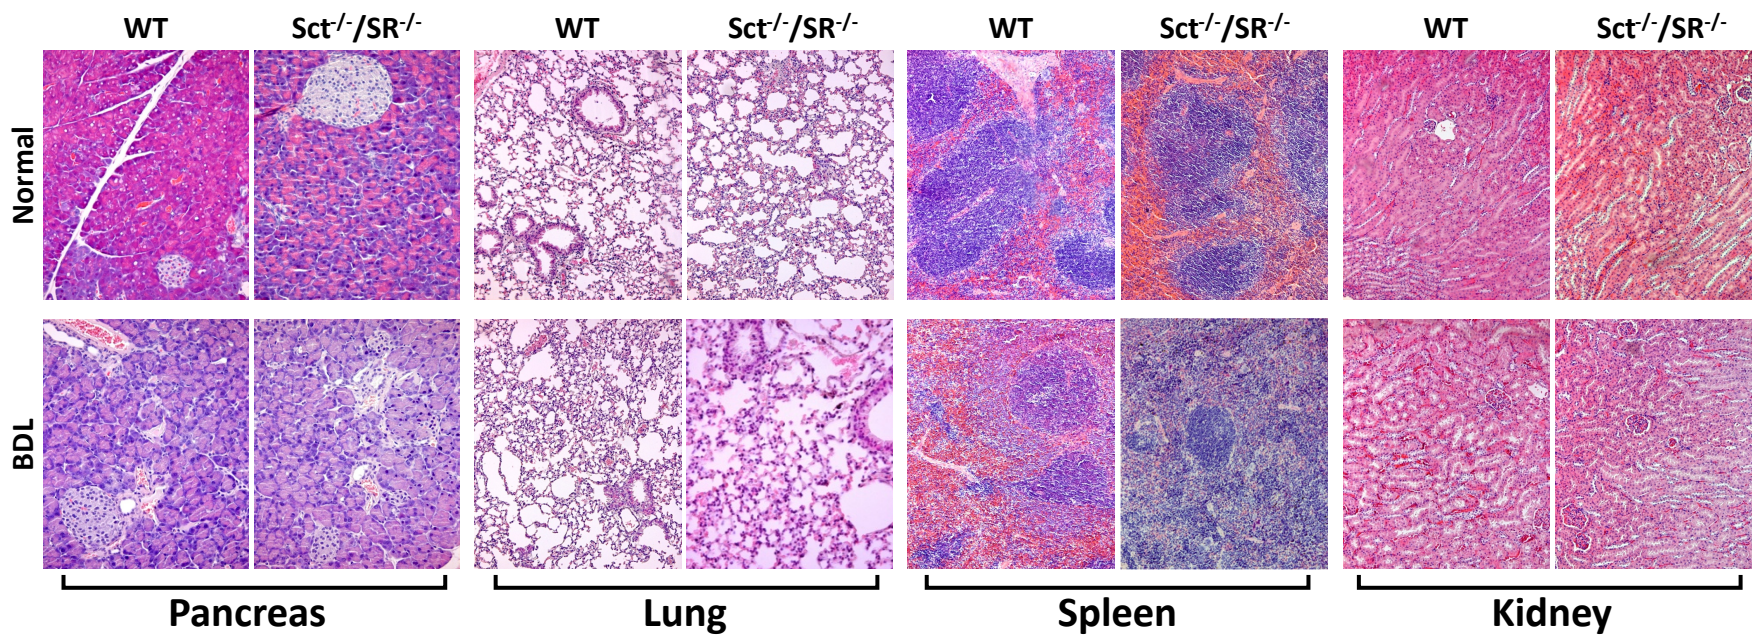

Supplement: mmc1.pdf [file mmc1.pdf]

# Supplemental Figure 2

**A**

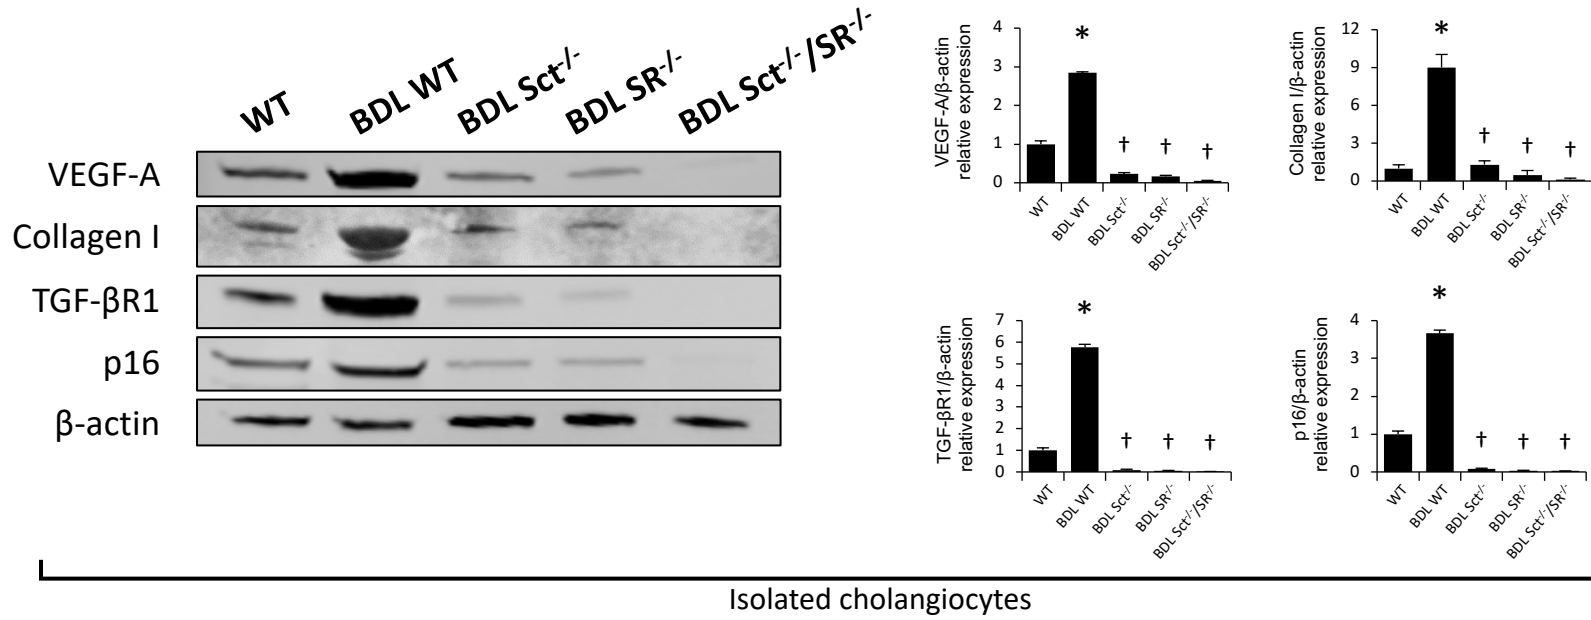

**B**

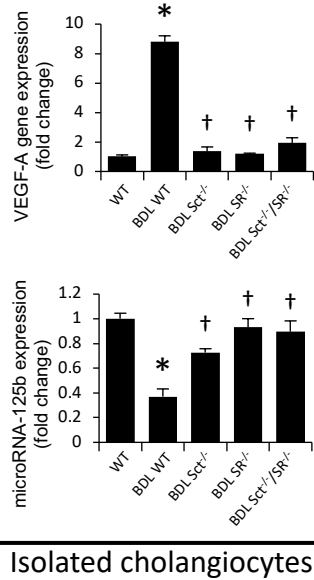

**C**

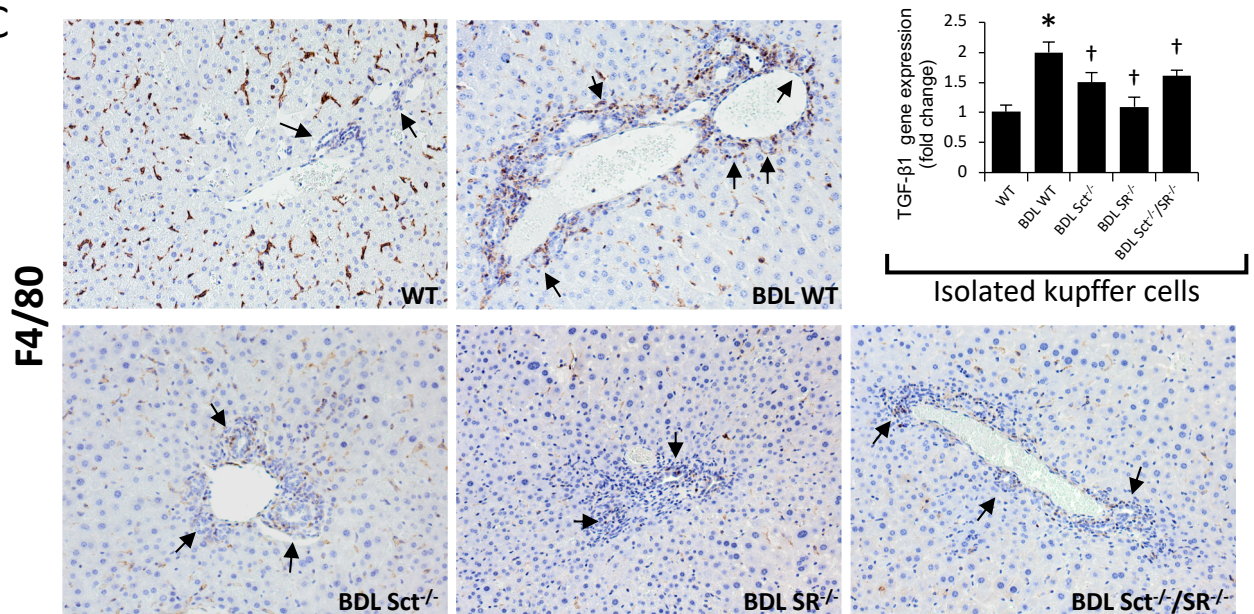

Supplement: mmc2.pdf [file mmc2.pdf]
